# Supplementary material for: High Serpin Family A Member 10 Expression Confers Platinum Sensitivity and Is Associated With Survival Benefit in High-Grade Serous Ovarian Cancer: Based on Quantitative Proteomic Analysis
Source: Front Oncol. 2021 Nov 23;11:761960. doi: 10.3389/fonc.2021.761960 (PMC8649623; doi:10.3389/fonc.2021.761960)
Supplement: Supplementary file 4 [file Table_3.xlsx]

## Sheet: Genesets
Table S3. Gene set enrichment analysis based on the proteomic data: Hallmarks that significantly correlated with platinum sensitive phenotype of HGSOC patients. Cutoff value, FDR q-value less than 0.001.
Hallmark name	SIZE	ES	NES	FDR q-val
NABA_MATRISOME	239	0.728378	3.82141	<10-5
NABA_CORE_MATRISOME	110	0.77026	3.57197	<10-5
BOQUEST_STEM_CELL_UP	110	0.762495	3.56055	<10-5
HSIAO_LIVER_SPECIFIC_GENES	132	0.740685	3.55483	<10-5
REACTOME_COMPLEMENT_CASCADE	54	0.853695	3.46688	<10-5
REACTOME_EXTRACELLULAR_MATRIX_ORGANIZATION	154	0.683558	3.42491	<10-5
KEGG_COMPLEMENT_AND_COAGULATION_CASCADES	51	0.843741	3.37485	<10-5
SCHUETZ_BREAST_CANCER_DUCTAL_INVASIVE_UP	173	0.661455	3.3148	<10-5
PICCALUGA_ANGIOIMMUNOBLASTIC_LYMPHOMA_UP	113	0.698156	3.30776	<10-5
NABA_MATRISOME_ASSOCIATED	129	0.694011	3.30477	<10-5
NABA_ECM_REGULATORS	78	0.753632	3.24009	<10-5
NABA_ECM_GLYCOPROTEINS	77	0.75095	3.22312	<10-5
WP_COMPLEMENT_AND_COAGULATION_CASCADES	43	0.82113	3.20193	<10-5
CAIRO_LIVER_DEVELOPMENT_DN	117	0.676912	3.20142	<10-5
REACTOME_REGULATION_OF_INSULIN_LIKE_GROWTH_FACTOR_IGF_TRANSPORT_AND_UPTAKE_BY_INSULIN_LIKE_GROWTH_FACTOR_BINDING_PROTEINS_IGFBPS	64	0.759906	3.20114	<10-5
LIM_MAMMARY_STEM_CELL_UP	143	0.659068	3.17416	<10-5
SMID_BREAST_CANCER_NORMAL_LIKE_UP	149	0.640263	3.10943	<10-5
REACTOME_BINDING_AND_UPTAKE_OF_LIGANDS_BY_SCAVENGER_RECEPTORS	40	0.796146	3.06747	<10-5
WP_HUMAN_COMPLEMENT_SYSTEM	69	0.721262	3.0662	<10-5
REACTOME_RESPONSE_TO_ELEVATED_PLATELET_CYTOSOLIC_CA2	86	0.687522	3.0531	<10-5
REACTOME_DEGRADATION_OF_THE_EXTRACELLULAR_MATRIX	63	0.71827	2.96533	<10-5
SABATES_COLORECTAL_ADENOMA_DN	55	0.723891	2.94503	<10-5
ONDER_CDH1_TARGETS_2_UP	99	0.642622	2.94237	<10-5
SERVITJA_LIVER_HNF1A_TARGETS_DN	52	0.721891	2.93962	<10-5
MCLACHLAN_DENTAL_CARIES_UP	111	0.623179	2.91732	<10-5
LINDGREN_BLADDER_CANCER_CLUSTER_2B	151	0.596969	2.9127	<10-5
PID_INTEGRIN1_PATHWAY	53	0.704251	2.90747	<10-5
REACTOME_ECM_PROTEOGLYCANS	49	0.730125	2.90452	<10-5
DESERT_PERIPORTAL_HEPATOCELLULAR_CARCINOMA_SUBCLASS_UP	51	0.727461	2.88721	<10-5
REACTOME_HEMOSTASIS	308	0.527858	2.86577	<10-5
SWEET_LUNG_CANCER_KRAS_DN	166	0.560591	2.85883	<10-5
NAKAYAMA_SOFT_TISSUE_TUMORS_PCA1_UP	50	0.704214	2.84375	<10-5
REACTOME_INITIAL_TRIGGERING_OF_COMPLEMENT	27	0.831457	2.84019	<10-5
REACTOME_PLATELET_ACTIVATION_SIGNALING_AND_AGGREGATION	151	0.576646	2.82174	<10-5
WP_COMPLEMENT_ACTIVATION	20	0.873592	2.81517	<10-5
LIU_PROSTATE_CANCER_DN	174	0.562998	2.81413	<10-5
WANG_SMARCE1_TARGETS_UP	108	0.597133	2.78513	<10-5
REACTOME_SCAVENGING_OF_HEME_FROM_PLASMA	21	0.866422	2.77098	<10-5
ANASTASSIOU_MULTICANCER_INVASIVENESS_SIGNATURE	35	0.75288	2.76788	<10-5
HOLLERN_EMT_BREAST_TUMOR_UP	62	0.661262	2.76739	<10-5
KEGG_ECM_RECEPTOR_INTERACTION	55	0.660959	2.74764	<10-5
VECCHI_GASTRIC_CANCER_EARLY_DN	78	0.616814	2.74383	<10-5
CAIRO_HEPATOBLASTOMA_CLASSES_DN	80	0.628435	2.742	<10-5
REACTOME_INTEGRIN_CELL_SURFACE_INTERACTIONS	57	0.662052	2.7332	<10-5
CHARAFE_BREAST_CANCER_LUMINAL_VS_MESENCHYMAL_DN	202	0.52994	2.73044	<10-5
REACTOME_COLLAGEN_FORMATION	46	0.691619	2.69065	<10-5
VECCHI_GASTRIC_CANCER_ADVANCED_VS_EARLY_UP	63	0.636207	2.67931	<10-5
CHEN_METABOLIC_SYNDROM_NETWORK	479	0.478259	2.67798	<10-5
REACTOME_ASSEMBLY_OF_COLLAGEN_FIBRILS_AND_OTHER_MULTIMERIC_STRUCTURES	33	0.733933	2.67451	<10-5
SMID_BREAST_CANCER_LUMINAL_B_DN	176	0.526338	2.64804	<10-5
OHGUCHI_LIVER_HNF4A_TARGETS_DN	35	0.718518	2.64636	<10-5
REACTOME_METABOLISM_OF_FAT_SOLUBLE_VITAMINS	21	0.800184	2.64348	<10-5
REACTOME_SIGNALING_BY_GPCR	138	0.535272	2.64235	<10-5
KEGG_FOCAL_ADHESION	112	0.562349	2.63183	<10-5
REACTOME_CD22_MEDIATED_BCR_REGULATION	13	0.915013	2.62778	<10-5
WANG_MLL_TARGETS	83	0.598916	2.62152	<10-5
REACTOME_ELASTIC_FIBRE_FORMATION	24	0.793606	2.61672	<10-5
REACTOME_G_ALPHA_I_SIGNALLING_EVENTS	78	0.602517	2.614	<10-5
BIOCARTA_COMP_PATHWAY	17	0.86123	2.60843	<10-5
REACTOME_CELL_SURFACE_INTERACTIONS_AT_THE_VASCULAR_WALL	72	0.597356	2.6029	<10-5
RODWELL_AGING_KIDNEY_NO_BLOOD_UP	111	0.554014	2.59659	<10-5
REACTOME_COLLAGEN_BIOSYNTHESIS_AND_MODIFYING_ENZYMES	32	0.732481	2.59385	<10-5
SU_LIVER	29	0.745961	2.59283	<10-5
GAUSSMANN_MLL_AF4_FUSION_TARGETS_F_UP	59	0.613772	2.58325	<10-5
NABA_BASEMENT_MEMBRANES	23	0.778154	2.58317	<10-5
REACTOME_COLLAGEN_CHAIN_TRIMERIZATION	19	0.798679	2.56367	<10-5
REACTOME_CREATION_OF_C4_AND_C2_ACTIVATORS	20	0.816843	2.56363	<10-5
REN_ALVEOLAR_RHABDOMYOSARCOMA_DN	245	0.487545	2.55912	<10-5
YAMASHITA_LIVER_CANCER_STEM_CELL_DN	34	0.699915	2.55839	<10-5
WP_FOCAL_ADHESION	107	0.548165	2.55698	<10-5
REACTOME_PARASITE_INFECTION	57	0.615769	2.55634	<10-5
REACTOME_IMMUNOREGULATORY_INTERACTIONS_BETWEEN_A_LYMPHOID_AND_A_NON_LYMPHOID_CELL	39	0.67187	2.555	<10-5
REACTOME_MOLECULES_ASSOCIATED_WITH_ELASTIC_FIBRES	23	0.786755	2.553	<10-5
REACTOME_ANTI_INFLAMMATORY_RESPONSE_FAVOURING_LEISHMANIA_PARASITE_INFECTION	49	0.654117	2.55153	<10-5
REACTOME_ANTIGEN_ACTIVATES_B_CELL_RECEPTOR_BCR_LEADING_TO_GENERATION_OF_SECOND_MESSENGERS	28	0.735231	2.54936	<10-5
BIOCARTA_ALTERNATIVE_PATHWAY	9	0.975674	2.54339	<10-5
SERVITJA_ISLET_HNF1A_TARGETS_UP	68	0.602108	2.54275	<10-5
MEBARKI_HCC_PROGENITOR_FZD8CRD_DN	85	0.57991	2.5365	<10-5
REACTOME_ROLE_OF_LAT2_NTAL_LAB_ON_CALCIUM_MOBILIZATION	19	0.786307	2.51517	<10-5
NABA_COLLAGENS	19	0.798679	2.51355	<10-5
PID_SYNDECAN_1_PATHWAY	26	0.727735	2.5122	<10-5
KEGG_DILATED_CARDIOMYOPATHY	35	0.663867	2.51112	<10-5
JAATINEN_HEMATOPOIETIC_STEM_CELL_DN	69	0.579218	2.50827	<10-5
INGRAM_SHH_TARGETS_UP	47	0.62935	2.50559	<10-5
REACTOME_FORMATION_OF_FIBRIN_CLOT_CLOTTING_CASCADE	22	0.758473	2.50274	<10-5
ZHU_CMV_24_HR_DN	35	0.672719	2.49967	<10-5
SMID_BREAST_CANCER_LUMINAL_A_UP	29	0.701251	2.49876	<10-5
REACTOME_LEISHMANIA_INFECTION	106	0.549135	2.49848	<10-5
REACTOME_COLLAGEN_DEGRADATION	30	0.711314	2.49829	<10-5
KEGG_PRION_DISEASES	23	0.756554	2.49139	<10-5
REACTOME_VISUAL_PHOTOTRANSDUCTION	25	0.724125	2.49076	<10-5
REACTOME_FCGR3A_MEDIATED_IL10_SYNTHESIS	32	0.675603	2.47201	<10-5
BOQUEST_STEM_CELL_CULTURED_VS_FRESH_UP	156	0.500045	2.4705	<10-5
BIOCARTA_CLASSIC_PATHWAY	14	0.856927	2.46873	<10-5
BOYAULT_LIVER_CANCER_SUBCLASS_G3_DN	34	0.682697	2.46327	<10-5
NAKAYAMA_SOFT_TISSUE_TUMORS_PCA2_DN	26	0.709574	2.46021	<10-5
CAIRO_HEPATOBLASTOMA_DN	93	0.539414	2.46002	<10-5
KEGG_HYPERTROPHIC_CARDIOMYOPATHY_HCM	35	0.669778	2.45369	<10-5
CLASPER_LYMPHATIC_VESSELS_DURING_METASTASIS_DN	23	0.757608	2.45304	<10-5
REACTOME_NON_INTEGRIN_MEMBRANE_ECM_INTERACTIONS	40	0.650175	2.4463	<10-5
YAO_TEMPORAL_RESPONSE_TO_PROGESTERONE_CLUSTER_0	17	0.7894	2.44532	<10-5
WP_RAS_AND_BRADYKININ_PATHWAYS_IN_COVID19	13	0.866743	2.44205	<10-5
WONG_ADULT_TISSUE_STEM_MODULE	229	0.467041	2.44071	<10-5
BROWN_MYELOID_CELL_DEVELOPMENT_UP	69	0.577013	2.43989	<10-5
TURASHVILI_BREAST_LOBULAR_CARCINOMA_VS_LOBULAR_NORMAL_DN	44	0.629111	2.43913	<10-5
KEGG_SYSTEMIC_LUPUS_ERYTHEMATOSUS	34	0.658918	2.43862	<10-5
RODWELL_AGING_KIDNEY_UP	237	0.465574	2.4371	<10-5
BERTUCCI_MEDULLARY_VS_DUCTAL_BREAST_CANCER_DN	63	0.585298	2.43586	<10-5
PILON_KLF1_TARGETS_UP	219	0.47572	2.43443	<10-5
REACTOME_FCERI_MEDIATED_CA_2_MOBILIZATION	29	0.690094	2.43377	<10-5
JECHLINGER_EPITHELIAL_TO_MESENCHYMAL_TRANSITION_UP	38	0.646313	2.4306	<10-5
WP_PROSTAGLANDIN_SYNTHESIS_AND_REGULATION	20	0.751052	2.41975	<10-5
REACTOME_FCGR_ACTIVATION	19	0.767233	2.41875	<10-5
MIKKELSEN_MEF_LCP_WITH_H3K4ME3	47	0.620881	2.4177	<10-5
BIOCARTA_LECTIN_PATHWAY	10	0.939457	2.41768	<10-5
WP_STATIN_PATHWAY	14	0.849312	2.41638	<10-5
REACTOME_PLASMA_LIPOPROTEIN_ASSEMBLY	13	0.84764	2.40961	<10-5
REACTOME_LAMININ_INTERACTIONS	24	0.738208	2.40482	1.04527e-05
DELYS_THYROID_CANCER_DN	76	0.557759	2.40349	1.03648e-05
SMIRNOV_CIRCULATING_ENDOTHELIOCYTES_IN_CANCER_UP	54	0.593828	2.40109	1.02785e-05
LI_INDUCED_T_TO_NATURAL_KILLER_UP	123	0.508599	2.4007	1.01935e-05
VERHAAK_GLIOBLASTOMA_MESENCHYMAL	133	0.490391	2.39808	2.02281e-05
ZHU_CMV_ALL_DN	52	0.591865	2.39243	3.01814e-05
BENPORATH_SUZ12_TARGETS	117	0.515012	2.39222	2.9938e-05
TARTE_PLASMA_CELL_VS_PLASMABLAST_UP	159	0.49038	2.38937	2.96985e-05
FARMER_BREAST_CANCER_CLUSTER_4	16	0.801162	2.38902	2.94628e-05
IGLESIAS_E2F_TARGETS_UP	90	0.528278	2.38901	2.92308e-05
REACTOME_FCERI_MEDIATED_MAPK_ACTIVATION	28	0.678705	2.38651	2.90025e-05
WONG_ENDMETRIUM_CANCER_DN	18	0.773536	2.38603	2.87777e-05
CUI_TCF21_TARGETS_UP	20	0.747811	2.38503	2.85563e-05
CHICAS_RB1_TARGETS_CONFLUENT	240	0.460275	2.38247	2.83383e-05
PASINI_SUZ12_TARGETS_DN	143	0.488506	2.37999	2.81236e-05
VERHAAK_AML_WITH_NPM1_MUTATED_DN	80	0.533774	2.37034	2.79122e-05
CHIANG_LIVER_CANCER_SUBCLASS_CTNNB1_DN	63	0.567802	2.37022	2.77039e-05
WP_MIRNA_TARGETS_IN_ECM_AND_MEMBRANE_RECEPTORS	20	0.728893	2.36986	2.74986e-05
REACTOME_MET_PROMOTES_CELL_MOTILITY	32	0.667506	2.36954	2.72964e-05
BIOCARTA_INTRINSIC_PATHWAY	15	0.821482	2.36938	2.70972e-05
LEE_BMP2_TARGETS_UP	266	0.446903	2.36767	2.69008e-05
LEE_LIVER_CANCER_SURVIVAL_UP	61	0.570694	2.36462	2.67073e-05
LIM_MAMMARY_LUMINAL_MATURE_DN	35	0.648366	2.364	2.65165e-05
ZHAN_MULTIPLE_MYELOMA_DN	22	0.718354	2.3637	2.63285e-05
GU_PDEF_TARGETS_UP	35	0.643431	2.35944	3.49466e-05
WP_BLOOD_CLOTTING_CASCADE	15	0.801242	2.35754	3.47022e-05
RUTELLA_RESPONSE_TO_HGF_VS_CSF2RB_AND_IL4_UP	190	0.466615	2.35133	3.44612e-05
BERTUCCI_INVASIVE_CARCINOMA_DUCTAL_VS_LOBULAR_DN	18	0.770654	2.35117	3.42236e-05
REACTOME_PLASMA_LIPOPROTEIN_ASSEMBLY_REMODELING_AND_CLEARANCE	31	0.656666	2.3462	3.39892e-05
TAKEDA_TARGETS_OF_NUP98_HOXA9_FUSION_8D_DN	71	0.543344	2.34401	3.3758e-05
CHIANG_LIVER_CANCER_SUBCLASS_PROLIFERATION_DN	57	0.565945	2.34004	4.19317e-05
KINSEY_TARGETS_OF_EWSR1_FLII_FUSION_DN	117	0.49615	2.33824	4.97385e-05
KIM_GLIS2_TARGETS_UP	47	0.592532	2.3378	4.94069e-05
HOSHIDA_LIVER_CANCER_SUBCLASS_S3	157	0.475794	2.33275	4.90797e-05
MIKKELSEN_MCV6_HCP_WITH_H3K27ME3	28	0.673097	2.32866	4.87568e-05
REACTOME_INTRINSIC_PATHWAY_OF_FIBRIN_CLOT_FORMATION	16	0.773398	2.32659	4.84381e-05
FLORIO_NEOCORTEX_BASAL_RADIAL_GLIA_UP	45	0.586998	2.32238	5.62146e-05
REACTOME_ROLE_OF_PHOSPHOLIPIDS_IN_PHAGOCYTOSIS	26	0.67681	2.31931	5.58519e-05
EBAUER_TARGETS_OF_PAX3_FOXO1_FUSION_UP	75	0.538912	2.31565	5.54939e-05
REACTOME_GPCR_LIGAND_BINDING	25	0.693935	2.31497	5.51404e-05
NABA_PROTEOGLYCANS	14	0.811613	2.31107	5.47914e-05
GAVIN_FOXP3_TARGETS_CLUSTER_P7	26	0.67211	2.31085	5.44468e-05
JOHANSSON_BRAIN_CANCER_EARLY_VS_LATE_DN	27	0.676511	2.30808	5.41065e-05
MARTENS_TRETINOIN_RESPONSE_UP	108	0.502432	2.30751	5.37705e-05
CASTELLANO_NRAS_TARGETS_UP	36	0.627954	2.306	5.34386e-05
HOSHIDA_LIVER_CANCER_SUBCLASS_S1	146	0.469591	2.29974	5.31107e-05
CROONQUIST_STROMAL_STIMULATION_UP	23	0.680854	2.29763	5.27869e-05
CADWELL_ATG16L1_TARGETS_UP	28	0.652631	2.29506	5.2467e-05
REACTOME_MUSCLE_CONTRACTION	55	0.559058	2.29382	6.70506e-05
REACTOME_MET_ACTIVATES_PTK2_SIGNALING	23	0.683125	2.29277	7.41286e-05
PID_INTEGRIN_CS_PATHWAY	20	0.707108	2.29119	7.36874e-05
REACTOME_DISEASES_ASSOCIATED_WITH_GLYCOSAMINOGLYCAN_METABOLISM	20	0.710234	2.28965	8.05173e-05
PID_AVB3_INTEGRIN_PATHWAY	41	0.591848	2.28825	8.00437e-05
LIU_VAV3_PROSTATE_CARCINOGENESIS_UP	49	0.574183	2.28339	7.95756e-05
WP_ALLOGRAFT_REJECTION	32	0.636922	2.28293	7.9113e-05
REACTOME_METABOLISM_OF_VITAMINS_AND_COFACTORS	84	0.50666	2.28209	7.86557e-05
YAMAZAKI_TCEB3_TARGETS_UP	80	0.520079	2.27754	8.52551e-05
HOWLIN_PUBERTAL_MAMMARY_GLAND	22	0.691596	2.27695	8.4768e-05
CROONQUIST_NRAS_SIGNALING_UP	14	0.786584	2.27622	8.42863e-05
REACTOME_NEUTROPHIL_DEGRANULATION	318	0.420638	2.27426	9.78752e-05
TOMLINS_PROSTATE_CANCER_DN	25	0.686221	2.27331	9.73254e-05
KAYO_CALORIE_RESTRICTION_MUSCLE_UP	49	0.574198	2.27121	0.000110461
LEIN_CHOROID_PLEXUS_MARKERS	38	0.605267	2.26721	0.000123524
VANASSE_BCL2_TARGETS_UP	14	0.800157	2.26718	0.000122841
REACTOME_SCAVENGING_BY_CLASS_A_RECEPTORS	13	0.810532	2.26705	0.000122167
MEBARKI_HCC_PROGENITOR_WNT_UP	56	0.550155	2.26466	0.000121499
NABA_ECM_AFFILIATED	31	0.624922	2.26425	0.00012774
ONDER_CDH1_SIGNALING_VIA_CTNNB1	34	0.611999	2.26375	0.00012705
ANDERSEN_LIVER_CANCER_KRT19_DN	36	0.603651	2.26174	0.000126367
BURTON_ADIPOGENESIS_8	43	0.588544	2.26137	0.000125691
TURASHVILI_BREAST_DUCTAL_CARCINOMA_VS_DUCTAL_NORMAL_DN	63	0.5324	2.25707	0.000137907
SANSOM_APC_TARGETS_DN	115	0.47879	2.25463	0.000150385
TAKEDA_TARGETS_OF_NUP98_HOXA9_FUSION_10D_DN	46	0.576496	2.24846	0.000175691
TSENG_ADIPOGENIC_POTENTIAL_DN	22	0.692633	2.24385	0.000181215
ZHENG_GLIOBLASTOMA_PLASTICITY_DN	23	0.67575	2.24238	0.000186828
DEMAGALHAES_AGING_UP	36	0.604006	2.24202	0.00018586
REACTOME_CELL_EXTRACELLULAR_MATRIX_INTERACTIONS	15	0.754337	2.23948	0.000191234
REACTOME_COMMON_PATHWAY_OF_FIBRIN_CLOT_FORMATION	12	0.802076	2.23695	0.000190254
REACTOME_TERMINAL_PATHWAY_OF_COMPLEMENT	8	0.933446	2.23185	0.000221008
LIAN_NEUTROPHIL_GRANULE_CONSTITUENTS	18	0.724687	2.23169	0.000219886
BAELDE_DIABETIC_NEPHROPATHY_UP	30	0.630819	2.22929	0.000218776
LANDIS_BREAST_CANCER_PROGRESSION_DN	40	0.591485	2.22746	0.000217676
KAAB_HEART_ATRIUM_VS_VENTRICLE_UP	108	0.477327	2.22668	0.000216588
WP_FOCAL_ADHESIONPI3KAKTMTORSIGNALING_PATHWAY	115	0.47473	2.22641	0.00021551
PETROVA_ENDOTHELIUM_LYMPHATIC_VS_BLOOD_DN	88	0.496674	2.22278	0.000214443
KIM_LIVER_CANCER_POOR_SURVIVAL_DN	22	0.678406	2.22263	0.000213387
MIYAGAWA_TARGETS_OF_EWSR1_ETS_FUSIONS_DN	60	0.535836	2.22098	0.000218584
BOQUEST_STEM_CELL_CULTURED_VS_FRESH_DN	17	0.715824	2.21799	0.000241629
PID_UPA_UPAR_PATHWAY	29	0.63915	2.2178	0.000240456
TSENG_IRS1_TARGETS_DN	60	0.530674	2.21462	0.00024521
VANLOO_SP3_TARGETS_DN	33	0.615161	2.21386	0.000244031
PID_FAK_PATHWAY	42	0.579029	2.21053	0.000248815
BEGUM_TARGETS_OF_PAX3_FOXO1_FUSION_UP	17	0.725398	2.2089	0.00024763
TURASHVILI_BREAST_LOBULAR_CARCINOMA_VS_DUCTAL_NORMAL_UP	44	0.569328	2.20636	0.000264073
REACTOME_CLASS_A_1_RHODOPSIN_LIKE_RECEPTORS	16	0.732828	2.20574	0.000268608
RIGGI_EWING_SARCOMA_PROGENITOR_UP	95	0.483187	2.20458	0.000278865
WINTER_HYPOXIA_DN	22	0.68027	2.20362	0.000277562
PETROVA_PROX1_TARGETS_DN	27	0.636643	2.20258	0.000276271
SHEDDEN_LUNG_CANCER_GOOD_SURVIVAL_A12	78	0.498081	2.2014	0.000280656
VART_KSHV_INFECTION_ANGIOGENIC_MARKERS_UP	38	0.578495	2.20124	0.000279363
NADLER_OBESITY_UP	44	0.568561	2.19996	0.000283728
OISHI_CHOLANGIOMA_STEM_CELL_LIKE_DN	101	0.477294	2.19948	0.000288226
ZHENG_IL22_SIGNALING_UP	20	0.687597	2.1986	0.000286916
GAJATE_RESPONSE_TO_TRABECTEDIN_UP	31	0.615498	2.19695	0.00029124
REACTOME_CHYLOMICRON_ASSEMBLY	9	0.890978	2.19558	0.000295545
SCHRAETS_MLL_TARGETS_DN	16	0.726121	2.19437	0.00029422
ROZANOV_MMP14_TARGETS_SUBSET	22	0.675397	2.19133	0.000303966
DURAND_STROMA_S_UP	77	0.502345	2.18943	0.000324418
BLANCO_MELO_RESPIRATORY_SYNCYTIAL_VIRUS_INFECTION_A594_CELLS_DN	18	0.713134	2.18769	0.0003285
BIOCARTA_AMI_PATHWAY	11	0.807422	2.18686	0.000332323
BLANCO_MELO_COVID19_SARS_COV_2_INFECTION_A594_ACE2_EXPRESSING_CELLS_RUXOLITINIB_DN	45	0.552552	2.18611	0.000330865
WEST_ADRENOCORTICAL_TUMOR_DN	230	0.416768	2.18582	0.00032942
HESS_TARGETS_OF_HOXA9_AND_MEIS1_DN	34	0.598092	2.18094	0.0003547
KORKOLA_YOLK_SAC_TUMOR	20	0.68268	2.18033	0.000353165
REACTOME_ACTIVATION_OF_C3_AND_C5	7	0.938926	2.17671	0.000373045
DAUER_STAT3_TARGETS_UP	16	0.719474	2.17408	0.000403361
BOYLAN_MULTIPLE_MYELOMA_C_D_DN	93	0.474376	2.17406	0.000401637
REACTOME_PEPTIDE_LIGAND_BINDING_RECEPTORS	15	0.726406	2.17304	0.000405228
KEGG_REGULATION_OF_ACTIN_CYTOSKELETON	115	0.463695	2.17172	0.000403511
URS_ADIPOCYTE_DIFFERENTIATION_DN	15	0.743497	2.1702	0.000427992
PEREZ_TP53_AND_TP63_TARGETS	47	0.549215	2.1699	0.000426194
SIMBULAN_PARP1_TARGETS_UP	16	0.723879	2.16546	0.000450454
WU_SILENCED_BY_METHYLATION_IN_BLADDER_CANCER	23	0.648466	2.16502	0.000448577
REACTOME_PLATELET_HOMEOSTASIS	35	0.585202	2.1622	0.000477401
REACTOME_SMOOTH_MUSCLE_CONTRACTION	25	0.639827	2.16038	0.000485753
CROMER_TUMORIGENESIS_UP	26	0.618099	2.15921	0.000493932
BENPORATH_ES_WITH_H3K27ME3	110	0.463383	2.15696	0.000507082
TONKS_TARGETS_OF_RUNX1_RUNX1T1_FUSION_ERYTHROCYTE_UP	56	0.531307	2.156	0.000510014
WALLACE_PROSTATE_CANCER_RACE_UP	104	0.467466	2.15178	0.000537807
GAUSSMANN_MLL_AF4_FUSION_TARGETS_E_UP	36	0.579962	2.15008	0.000560404
REACTOME_NCAM1_INTERACTIONS	13	0.754997	2.14735	0.000578263
MANALO_HYPOXIA_UP	73	0.493911	2.14707	0.00057594
REACTOME_METABOLISM_OF_ANGIOTENSINOGEN_TO_ANGIOTENSINS	12	0.778137	2.14463	0.00059347
ALTEMEIER_RESPONSE_TO_LPS_WITH_MECHANICAL_VENTILATION	37	0.571503	2.14414	0.000595992
MARKEY_RB1_ACUTE_LOF_DN	119	0.455956	2.14371	0.000598539
RIGGI_EWING_SARCOMA_PROGENITOR_DN	54	0.52516	2.14312	0.000606059
REACTOME_G_ALPHA_Q_SIGNALLING_EVENTS	46	0.541442	2.13912	0.000652656
SANA_TNF_SIGNALING_DN	42	0.549978	2.1388	0.000655026
REACTOME_PLASMA_LIPOPROTEIN_REMODELING	10	0.836854	2.1373	0.000676675
HELLEBREKERS_SILENCED_DURING_TUMOR_ANGIOGENESIS	37	0.577072	2.13458	0.000698267
REACTOME_GLYCOSAMINOGLYCAN_METABOLISM	36	0.575881	2.13111	0.000733706
KONDO_EZH2_TARGETS	66	0.510649	2.12999	0.000750078
WP_INFLAMMATORY_RESPONSE_PATHWAY	12	0.779623	2.12879	0.000771004
LINDGREN_BLADDER_CANCER_HIGH_RECURRENCE	30	0.598633	2.12581	0.000810877
WP_METABOLIC_PATHWAY_OF_LDL_HDL_AND_TG_INCLUDING_DISEASES	6	0.93303	2.12541	0.000807782
REACTOME_DEFECTS_OF_CONTACT_ACTIVATION_SYSTEM_CAS_AND_KALLIKREIN_KININ_SYSTEM_KKS	8	0.857877	2.12508	0.00080471
SWEET_KRAS_TARGETS_UP	37	0.561841	2.12485	0.000806427
SENGUPTA_NASOPHARYNGEAL_CARCINOMA_WITH_LMP1_DN	39	0.564397	2.12478	0.000803384
CERVERA_SDHB_TARGETS_2	37	0.569668	2.12172	0.000832781
WP_MICROGLIA_PATHOGEN_PHAGOCYTOSIS_PATHWAY	27	0.614272	2.12134	0.000834371
PID_ER_NONGENOMIC_PATHWAY	27	0.614264	2.11722	0.000867843
KEGG_LYSOSOME	64	0.508567	2.11568	0.000883085
ICHIBA_GRAFT_VERSUS_HOST_DISEASE_35D_UP	80	0.480977	2.11491	0.000879814
APPEL_IMATINIB_RESPONSE	22	0.657522	2.11438	0.000890263
REACTOME_CHYLOMICRON_REMODELING	7	0.917625	2.11192	0.000932441
JI_CARCINOGENESIS_BY_KRAS_AND_STK11_DN	9	0.847787	2.11164	0.000933542
PANGAS_TUMOR_SUPPRESSION_BY_SMAD1_AND_SMAD5_UP	51	0.532778	2.11158	0.000930135
REACTOME_FCGAMMA_RECEPTOR_FCGR_DEPENDENT_PHAGOCYTOSIS	76	0.481305	2.11092	0.000931206
PETRETTO_CARDIAC_HYPERTROPHY	23	0.633204	2.10985	0.00094569
